# Supplementary material for: Controlled synthesis of Co3O4@NiMoO4 core–shell nanorod arrays for efficient water splitting
Source: Royal Society of Chemistry journal article supplement (doi:10.1039/c8dt02305k), 2018-01-01
Supplement: c8dt02305k1.pdf [file c8dt02305k1.pdf]

## Controlled synthesis of $\text{Co}_3\text{O}_4@\text{NiMoO}_4$ core-shell nanorods arrays for efficient water splitting

Xiaoqiang Du,<sup>a\*</sup> Nai Li,<sup>a</sup> and Xiaoshuang Zhang<sup>b\*</sup>

### Sample preparation

In a typical synthesis, 0.8 g of  $\text{Co}(\text{NO}_3)_2 \cdot 6\text{H}_2\text{O}$  and 0.8 g of  $\text{CO}(\text{NH}_2)_2$  were dissolved in 70 mL of deionized water under stirring to form a clear solution. The above solution and a piece of pre-treated Ni foam were transferred into a 100 mL autoclave and maintained at 100 °C for 8 h. The product was rinsed with deionized water and annealed at 350 °C for 2 h in air. The wire-like  $\text{Co}_3\text{O}_4$  arrays were obtained on the Ni foam. Then, the obtained  $\text{Co}_3\text{O}_4$  arrays on Ni foam were loaded in a solution containing 80 mL of deionized water, 2 mmol  $\text{Na}_2\text{MoO}_4 \cdot 2\text{H}_2\text{O}$  and  $\text{Ni}(\text{NO}_3)_2 \cdot 6\text{H}_2\text{O}$ . The reaction was conducted for 12 h and then cooled naturally. The resulting product was finally annealed at 400 °C for 2 h in air. The rod-like  $\text{Co}_3\text{O}_4@\text{NiMoO}_4$  nanostructures were obtained.

The resulting  $\text{Co}_3\text{O}_4@\text{NiMoO}_4$  materials with different treatment times ( $t_R = 8$  h) were named as  $\text{Co}_3\text{O}_4@\text{NiMoO}_4/\text{NF}-8\text{h}$ .

### Material characterization

The crystal composition of the synthesized samples was determined by Powder X-ray diffraction (PXRD) using a PANalytical X'Pert Pro Diffractometer with  $\text{Cu K}\alpha$  radiation (step size: 0.017°, step time: 10.34 s) operating at 40 kV and 60 mA. The morphologies of the catalysts were characterized by Scanning electron microscopy (SEM) images equipped with a Hitachi S-4800 microscope (scanning voltage, 7 kV). X-ray photoelectron spectra (XPS) measurements were performed by ESCALAB250xi with 150 W  $\text{Al K}\alpha$  radiation.

### Electrochemical tests

Electrochemical measurement was performed with a CHI 660E electrochemical analyzer (CH Instruments, Chenhua Co., Shanghai, China) in a standard three-electrode system using  $\text{Co}_3\text{O}_4@\text{NiMoO}_4/\text{NF}$  as the working electrode and its working area for OER is  $\sim 1.0 \text{ cm}^2$ , platinum wire electrode as a counter electrode, and a  $\text{Ag}/\text{AgCl}$  as a reference electrode. All linear-sweep voltammograms (LSV) were performed in 1 M KOH aqueous electrolyte. For OER performance, linear sweep voltammetry (LSV) polarization curves were recorded from 0.2–0.8 V versus saturated  $\text{Ag}/\text{AgCl}$  at a scan rate of  $2 \text{ mV s}^{-1}$ . Chronoamperometric measurements were tested on corresponding potential to support a current density of about  $4 \text{ mA cm}^{-2}$  for 12 h. All potentials in this work were noted versus the reversible (RHE), which were converted using equation  $E_{\text{RHE}} = E_{\text{Ag}/\text{AgCl}} + 0.197 + 0.059 \times \text{pH}$  (1 M KOH,  $\text{pH} \sim 13.6$ ), in which the  $E_{\text{RHE}}$  is the potential referred to RHE and  $E_{\text{Ag}/\text{AgCl}}$  is measured potential against the reference electrode. The electrochemical active surface areas (ECSAs) were evaluated from the electrochemical double-layer capacitance ( $C_{\text{dl}}$ ) through collecting cyclic voltammogram (CVs) in the potential range without Faradaic process at various scan rates including 10, 20, 30, 40, 50  $\text{mV s}^{-1}$  in the potential range from 0.02–0.12 V versus  $\text{Ag}/\text{AgCl}$ . The overpotential ( $\eta$ ) is calculated using the following equation:  $\eta = E_{\text{RHE}} - 1.23 \text{ V}$ .

**Table S1.** Comparison of water oxidation performance for Co<sub>3</sub>O<sub>4</sub>@NiMoO<sub>4</sub>/NF with other non-noble-metal WOCs under alkaline conditions.

| Catalyst                                               | j (mA cm <sup>-2</sup> ) | $\eta$ (mV) | Ref.                                        |
|--------------------------------------------------------|--------------------------|-------------|---------------------------------------------|
| Co <sub>3</sub> O <sub>4</sub> @NiMoO <sub>4</sub> /NF | 15                       | 330         | This work                                   |
| Co <sub>3</sub> O <sub>4</sub> /NF                     | 15                       | 370         | This work                                   |
| NiMoO <sub>4</sub> /NF                                 | 15                       | 440         | This work                                   |
| RuO <sub>2</sub> /NF                                   | 15                       | 330         | This work                                   |
| CoMoO <sub>4</sub> /NF                                 | 10                       | 312         | Chem. Commun., 2015, 51, 14361              |
| FeMoO <sub>4</sub> /NF                                 | 50                       | 293         | Inorg. Chem. Front., 2018, 5, 665           |
| CaMoO <sub>4</sub> /NF                                 | 50                       | 345         | Chem. Commun. 2018, 54, 5066                |
| NiFe/NF                                                | 20                       | 264         | Int. J. Hydrogen Energy, 2016, 41, 8785     |
| NiSe/NF                                                | 20                       | 270         | Angew. Chem., Int. Ed., 2015, 54, 9351      |
| 2D CuO                                                 | 10                       | 350         | J. Mater. Chem. A, 2017, 5, 12747           |
| NiFeMn-LDH                                             | 10                       | 310         | Chem. Commun., 2016, 52, 908                |
| NiCo <sub>2</sub> O <sub>4</sub> @Ni-Co-B/CC           | 10                       | 270         | Inorg. Chem. Front., 2017, 4, 1546          |
| Ni <sub>0.75</sub> V <sub>0.25</sub> -LDH              | 57                       | 350         | Nature Commun., 2016, 7, 11981              |
| NiCo <sub>2</sub> S <sub>4</sub> @NiFe LDH/NF          | 60                       | 201         | ACS Appl. Mater. Interfaces, 2017, 9, 15364 |

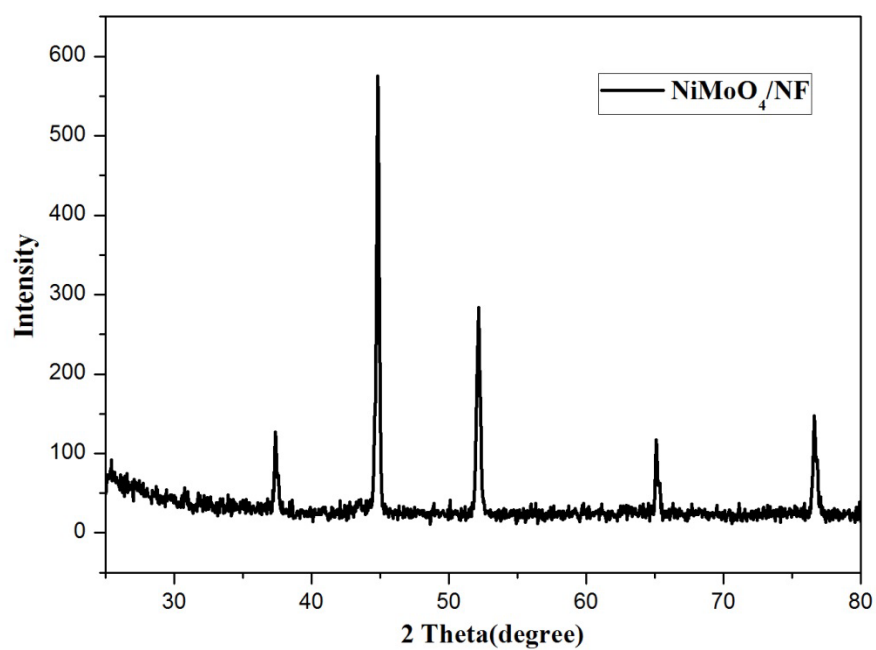

**Fig. S1** XRD of NiMoO<sub>4</sub>/NF.

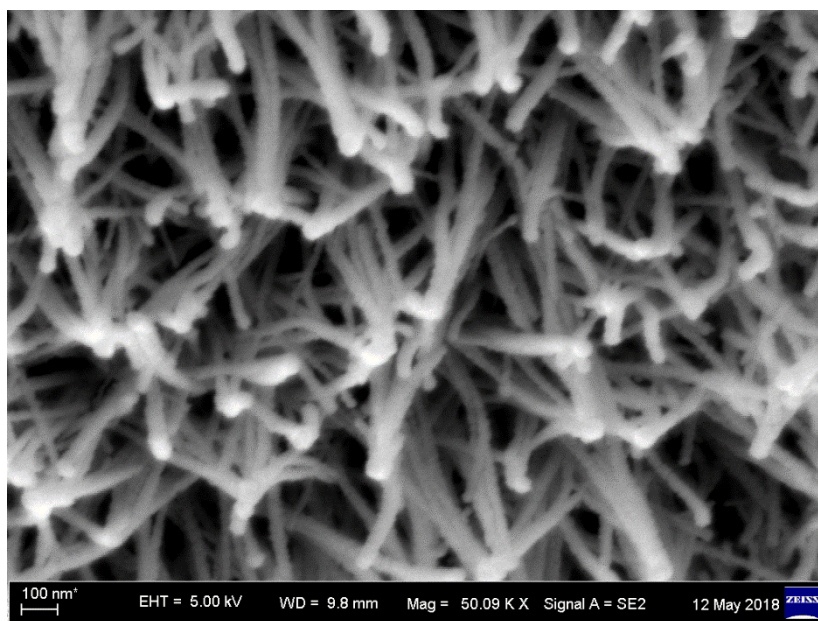

**Fig. S2** SEM of Co<sub>3</sub>O<sub>4</sub>/NF.

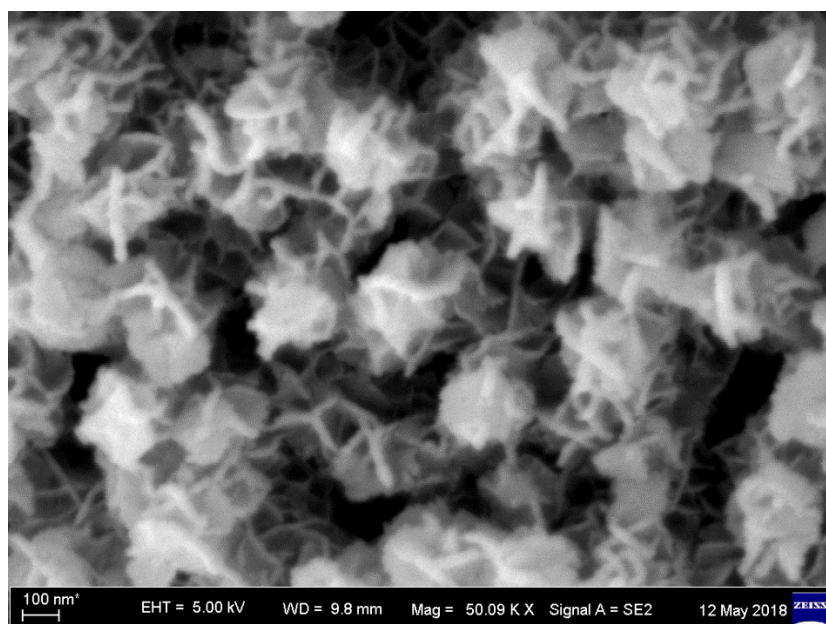

**Fig. S3** SEM of  $\text{Co}_3\text{O}_4@\text{NiMoO}_4/\text{NF}$ .

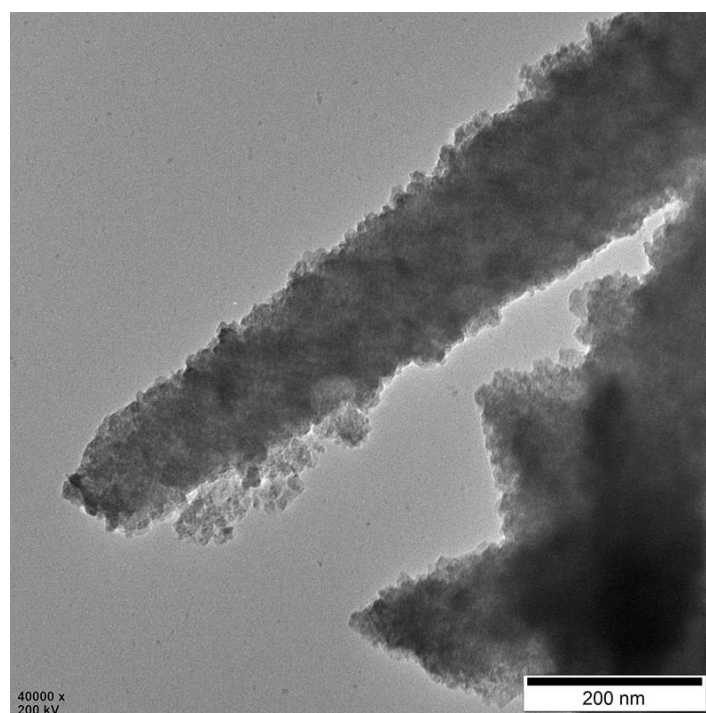

**Fig. S4** TEM of  $\text{Co}_3\text{O}_4@\text{NiMoO}_4/\text{NF}$ .

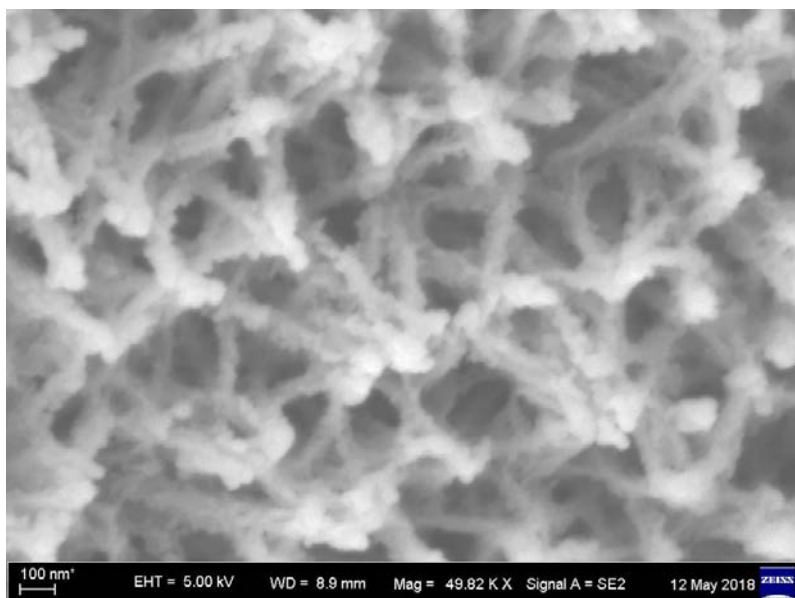

**Fig. S5** SEM of  $\text{Co}_3\text{O}_4/\text{NiMoO}_4/\text{NF-8h}$ .

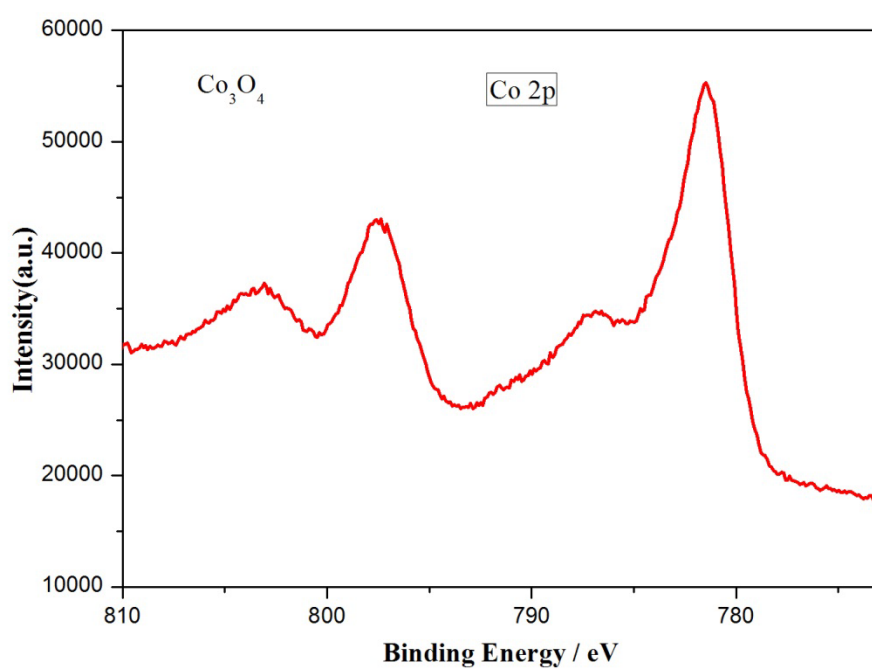

**Fig. S6** XPS spectra of the Co 2p for  $\text{Co}_3\text{O}_4/\text{NF}$ .

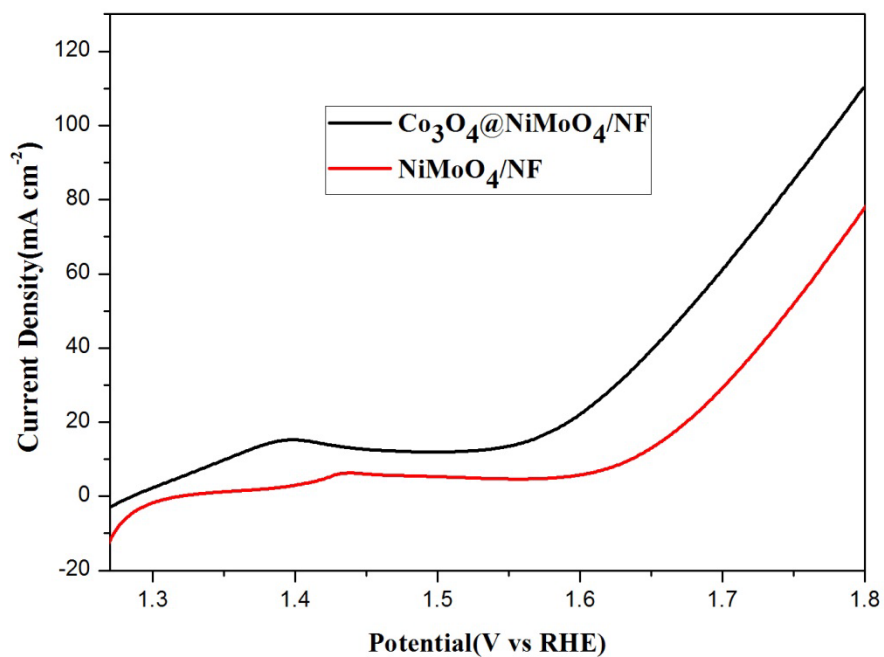

**Fig.S7** OER polarization curves for the  $\text{Co}_3\text{O}_4@\text{NiMoO}_4/\text{NF}$  and  $\text{NiMoO}_4/\text{NF}$ .

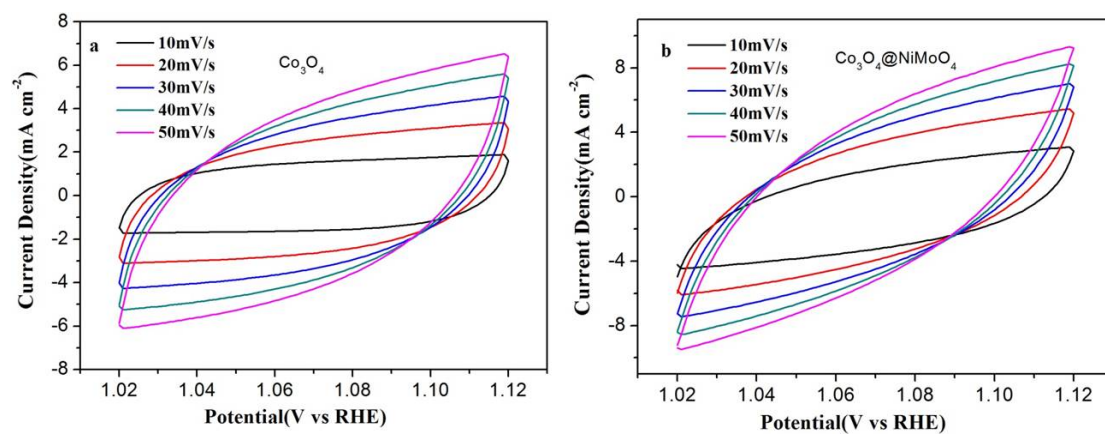

**Fig. S8** CVs of  $\text{Co}_3\text{O}_4/\text{NF}$  and  $\text{Co}_3\text{O}_4@\text{NiMoO}_4/\text{NF}$  with different scan rates (10-50  $\text{mV s}^{-1}$ ) in the region of 1.02-1.12V vs RHE.

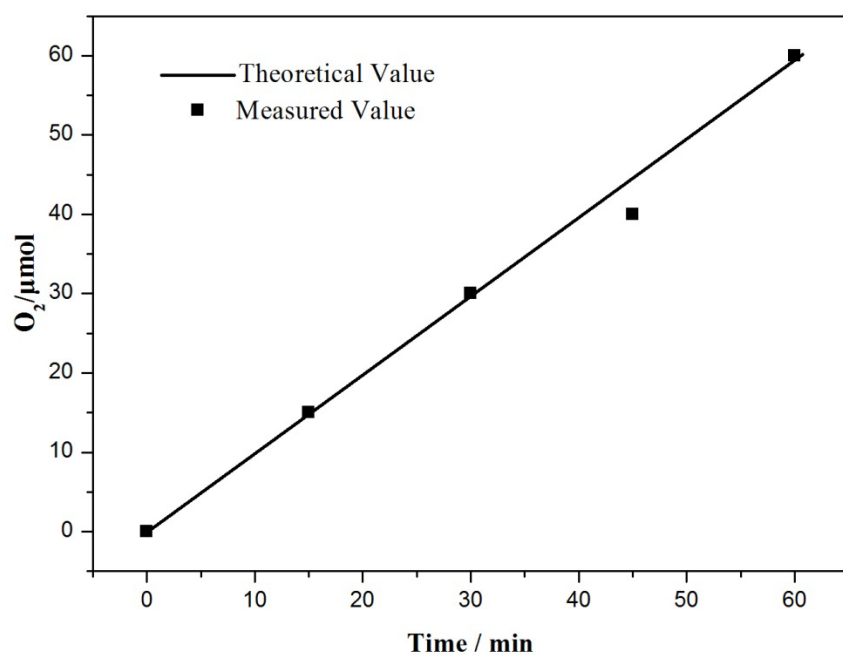

**Fig. S9** Electrocatalytic efficiency of  $\text{O}_2$  production over  $\text{Co}_3\text{O}_4@\text{NiMoO}_4/\text{NF}$  at a potential of ca. 1.55 V, measured for 60 min.

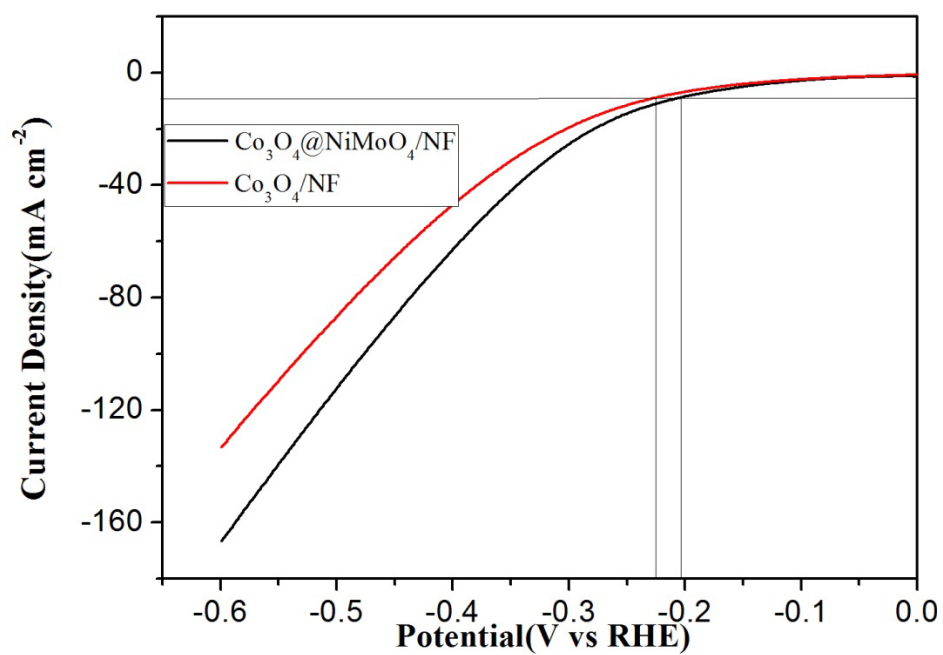

**Fig. S10** HER polarization curves for the  $\text{Co}_3\text{O}_4@\text{NiMoO}_4/\text{NF}$  and  $\text{Co}_3\text{O}_4/\text{NF}$ .

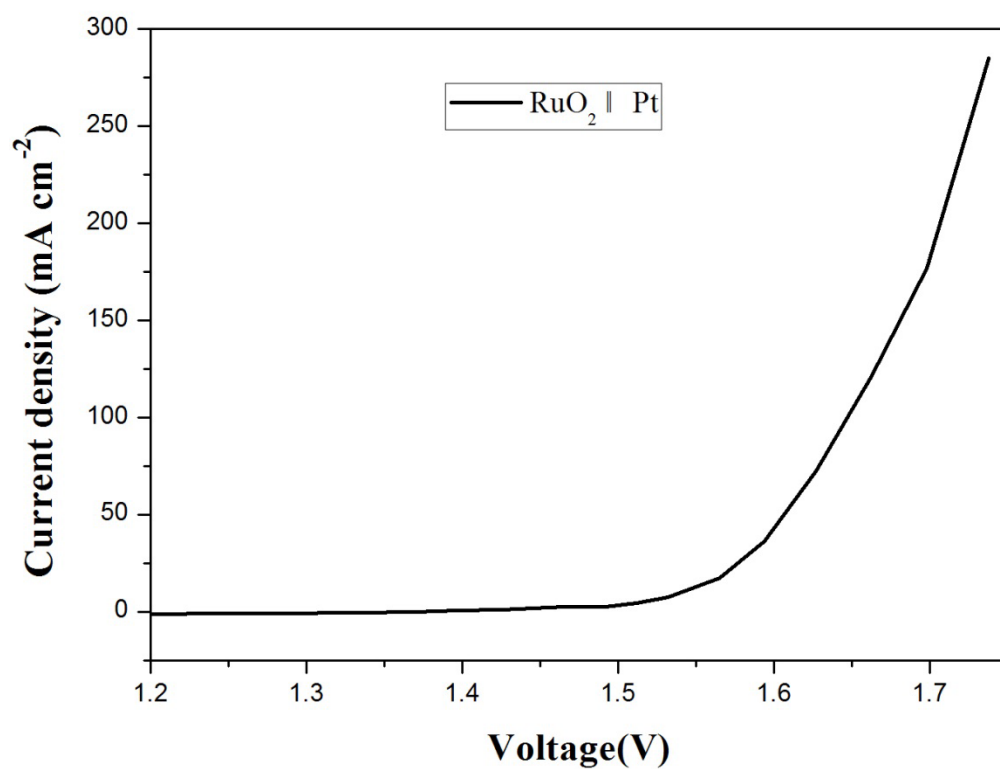

**Fig. S11** Polarization curve of the RuO<sub>2</sub> and Pt for water splitting with a scan rate of 5 mV s<sup>-1</sup> in 1 M KOH.

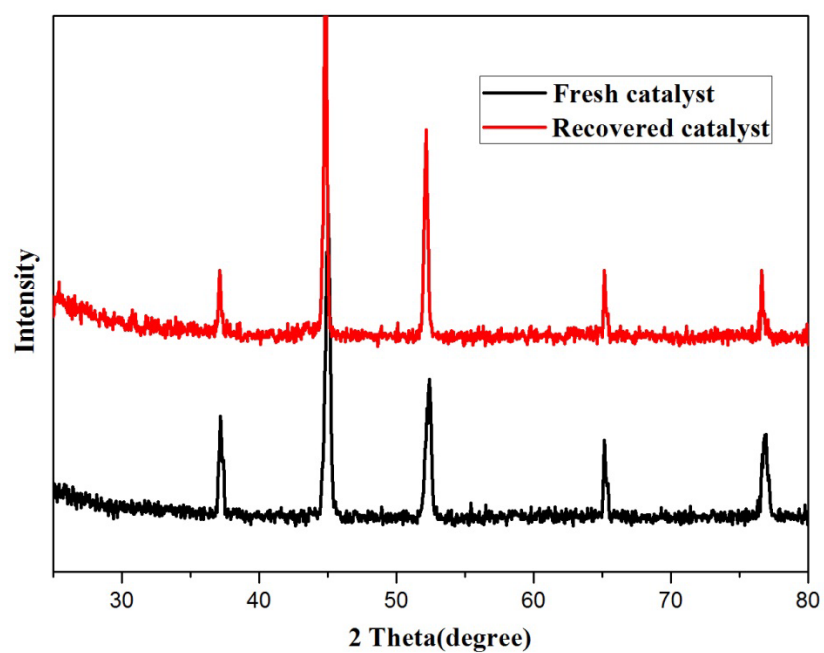

**Fig. S12** XRD of fresh catalyst and recovered catalyst.



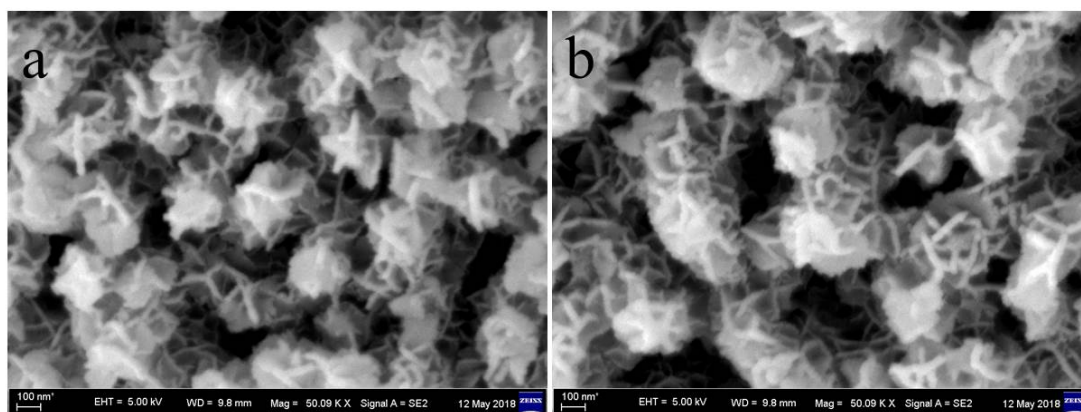

**Fig. S13** SEM of fresh catalyst (a) and recovered catalyst (b).

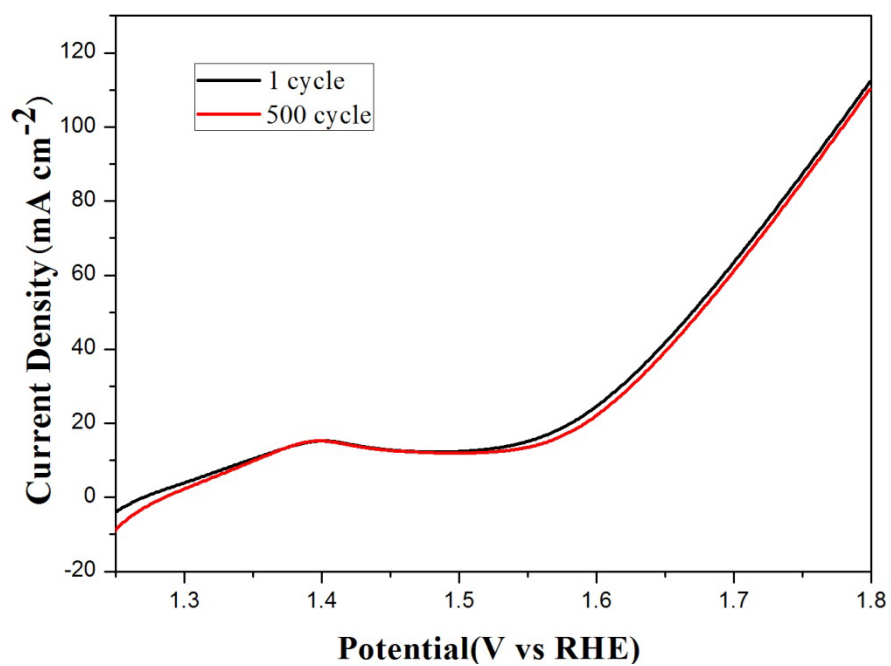

**Fig.S14** OER polarization curves for the  $\text{Co}_3\text{O}_4/\text{NiMoO}_4/\text{NF}$  before and after 500 cycles of the accelerated stability test.

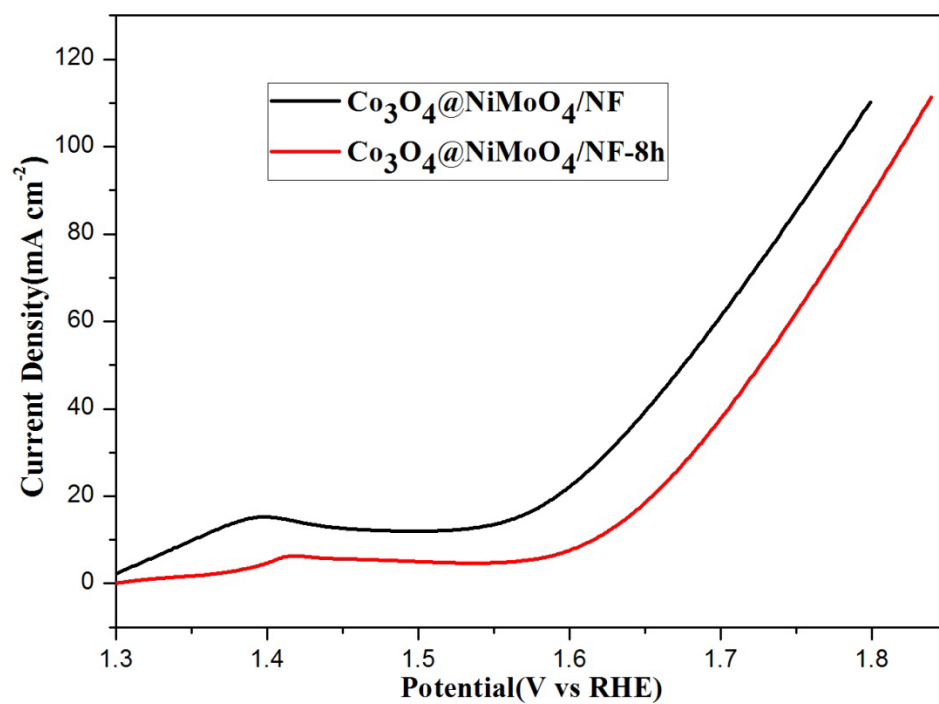

**Fig.S15** OER polarization curves for the Co<sub>3</sub>O<sub>4</sub>@NiMoO<sub>4</sub>/NF and Co<sub>3</sub>O<sub>4</sub>@NiMoO<sub>4</sub>/NF-8h.
